# Supplementary material for: Assembling photoactive materials from polycyclic aromatic hydrocarbons (PAHs): room temperature phosphorescence and excimer-emission in co-crystals with 1,4-diiodotetrafluorobenzene
Source: Royal Society of Chemistry journal article supplement (doi:10.1039/d2ce00720g), 2022-01-01
Supplement: d2ce00720g1.pdf [file d2ce00720g1.pdf]

# Assembling Photoactive Materials from Polycyclic Aromatic Hydrocarbons (PAHs): Room Temperature Phosphorescence and Excimer-Emission in Co-Crystals with 1,4-Diiodotetrafluorobenzene

Alessandra Azzali,<sup>a</sup> Simone d'Agostino,<sup>a</sup> Mattia Capacci,<sup>a</sup> Floriana Spinelli,<sup>a</sup> Barbara Ventura,<sup>\*b</sup> and Fabrizia Grepioni<sup>\*a</sup>

<sup>a</sup> Dipartimento di Chimica "Giacomo Ciamician", Università di Bologna, Via F. Selmi, 2, 40126 Bologna, Italy

<sup>b</sup> Istituto ISOF-CNR, Via P. Gobetti, 101, 40219 Bologna, Italy

## ELECTRONIC SUPPORTING INFORMATION (8 pages)

| <b>Content</b>                                       | <b><i>page</i></b> |
|------------------------------------------------------|--------------------|
| Reagents stoichiometric ratios and reactions outcome | ESI-2              |
| ORTEP drawings                                       | ESI-2              |
| Powder X-ray diffraction patterns                    | ESI-3              |
| Thermal gravimetric analysis (TGA)                   | ESI-4              |
| Photodimerization of MA                              | ESI-5              |
| NMR spectra                                          | ESI-6              |
| Absorption, emission and excitation spectra          | ESI-7              |
| Excited state lifetimes                              | ESI-8              |
| Intermolecular interaction energies                  | ESI-10             |
| References                                           | ESI-12             |

## Synthesis

**Table ESI-1.** Amounts of reagents used in the synthesis of the co-crystals  $A \cdot (I2F4)_2$ ,  $MA \cdot I2F4$ , and  $(MA)_4 \cdot I2F4$ . A = anthracene, MA = 9-methylanthracene, and I2F4 = 1,4-diiodotetrafluorobenzene.

| PAH | (mg / mmol) | I2F4<br>(mg /mmol) | Stoichiometric<br>Ratio | Outcome                                  |
|-----|-------------|--------------------|-------------------------|------------------------------------------|
| A   | 62 / 0.35   | 140 / 0.35         | 1:1                     | $A \cdot (I2F4)_2 + A$                   |
| A   | 96 / 0.50   | 100 / 0.25         | 2:1                     | $A \cdot (I2F4)_2 + A$                   |
| A   | 37 / 0.21   | 170 / 0.42         | 1:2                     | $A \cdot (I2F4)_2$                       |
| MA  | 67 / 0.34   | 140 / 0.34         | 1:1                     | $MA \cdot I2F4$                          |
| MA  | 36 / 0.18   | 150 / 0.37         | 1:2                     | $MA \cdot I2F4 + I2F4$                   |
| MA  | 95 / 0.49   | 100 / 0.25         | 2:1                     | $(MA)_4 \cdot I2F4 + MA + MA \cdot I2F4$ |
| MA  | 119 / 0.61  | 90 / 0.22          | 3:1                     | $(MA)_4 \cdot I2F4 + MA + MA \cdot I2F4$ |
| MA  | 133 / 0.69  | 70 / 0.17          | 4:1                     | $(MA)_4 \cdot I2F4$                      |

### Ortep Drawings

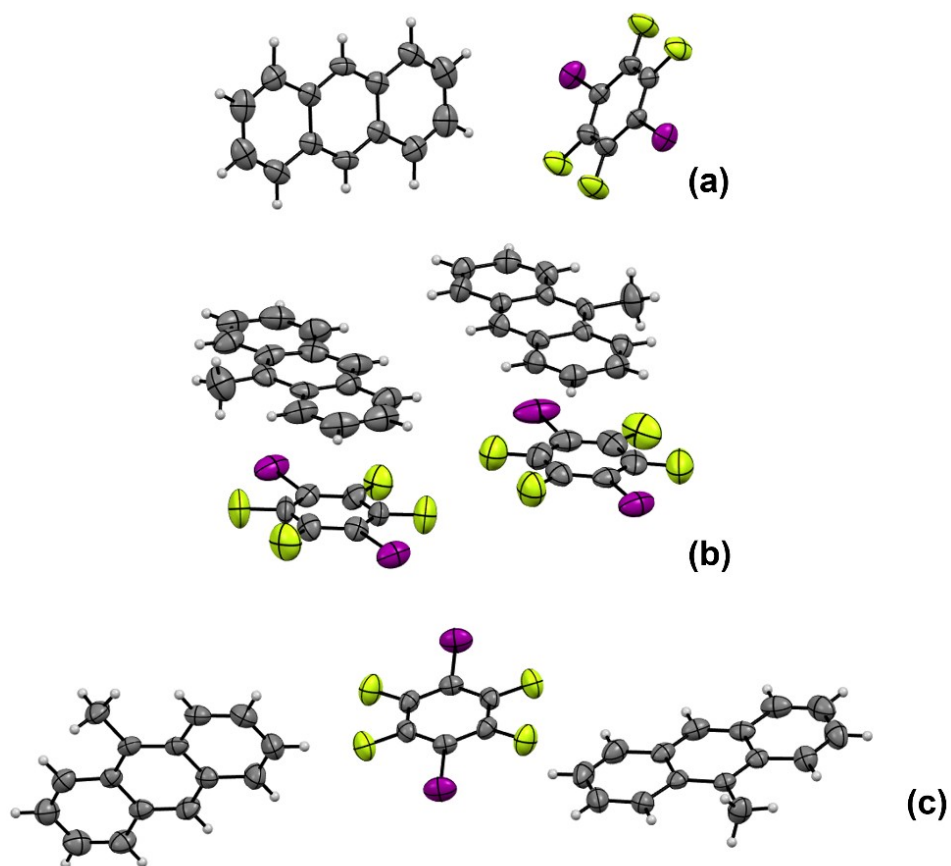

**Figure ESI-1.** ORTEP plots of the co-crystals (a)  $A \cdot (I2F4)_2$ , (b)  $MA \cdot I2F4$ , and (c)  $(MA)_4 \cdot I2F4$ . All the non-hydrogen atoms are represented by their 50% probability ellipsoids.

### Powder X-ray Diffraction patterns

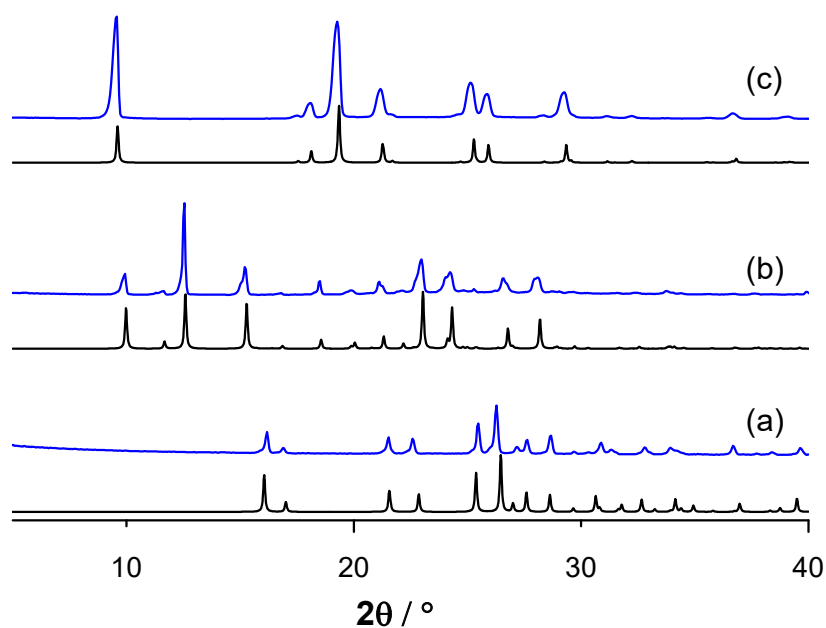

**Figure ESI-2.** Powder XRD patterns comparison between experimental (blue lines) and calculated on the basis of single crystal data retrieved from the CSD (black lines): (a) 1,4-diiodotetrafluorobenzene (refcode ZZZAVM02), (b) methylantracene (refcode MANTHR01), and (c) anthracene (refcode ANTCEN).

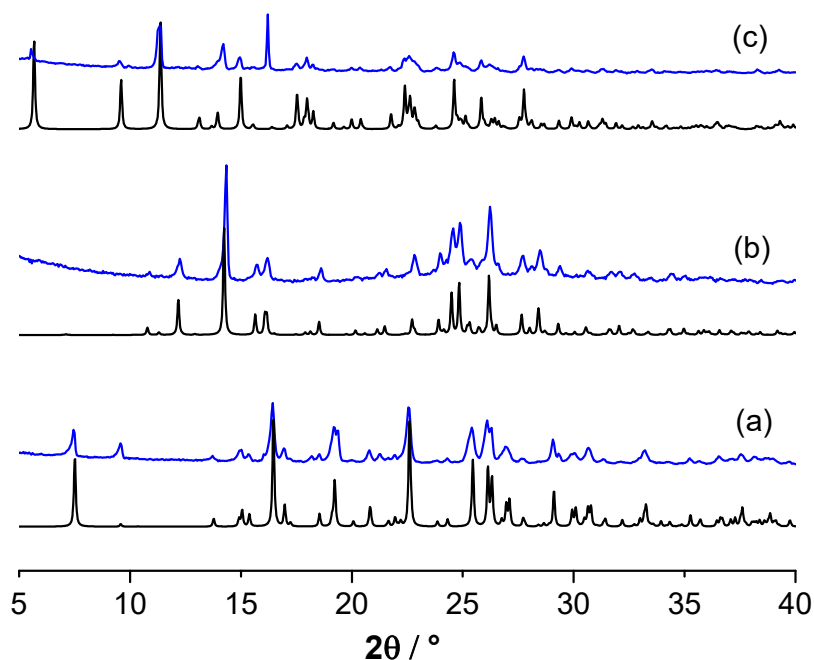

**Figure ESI-3.** Powder XRD patterns comparison between experimental (blue lines) and calculated on the basis of single crystal data from this work (black lines): (a)  $A \cdot (I_2F_4)_2$ , (b)  $MA \cdot I_2F_4$ , and (c)  $(MA)_4 \cdot I_2F_4$ .

### Thermal gravimetric analysis (TGA)

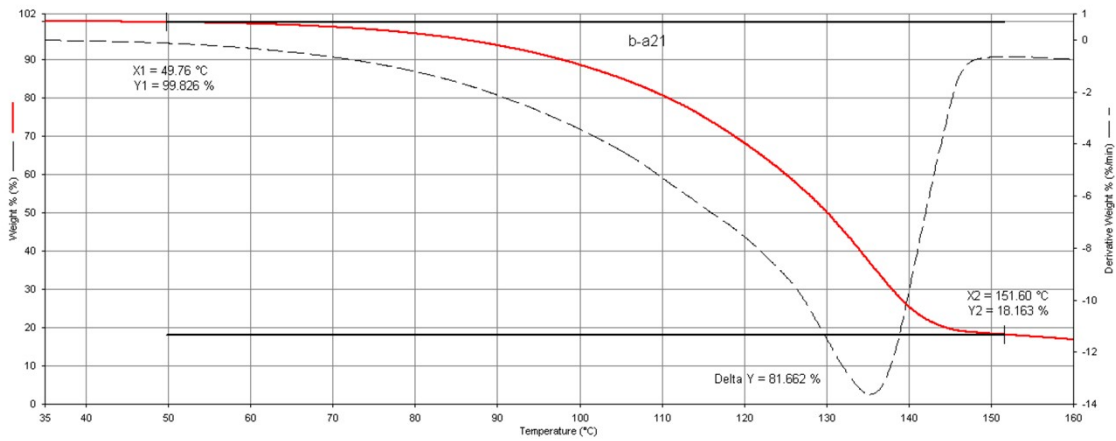

Figure ESI-4. Thermogram of A·(I2F4)2.

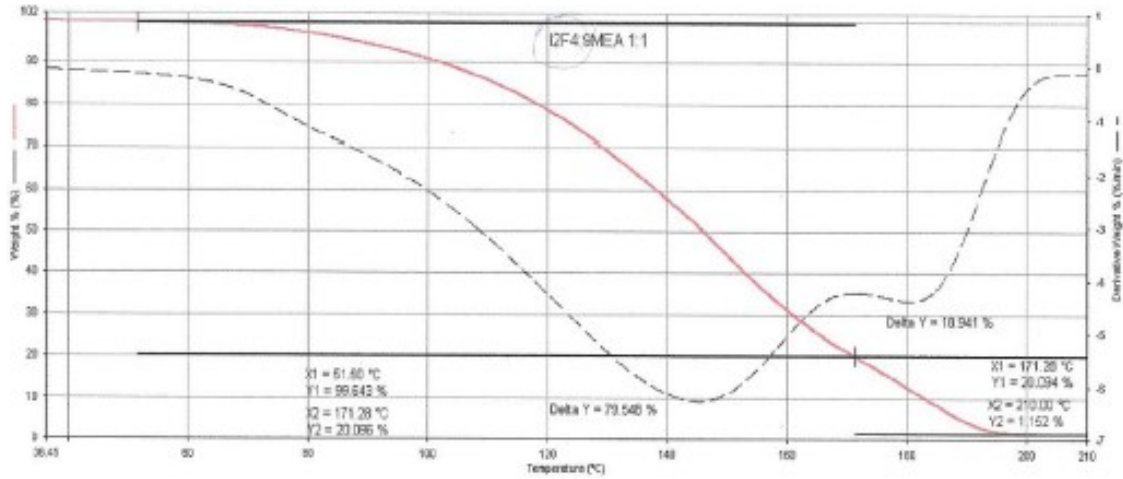

Figure ESI-5. Thermogram of MA·I2F4.

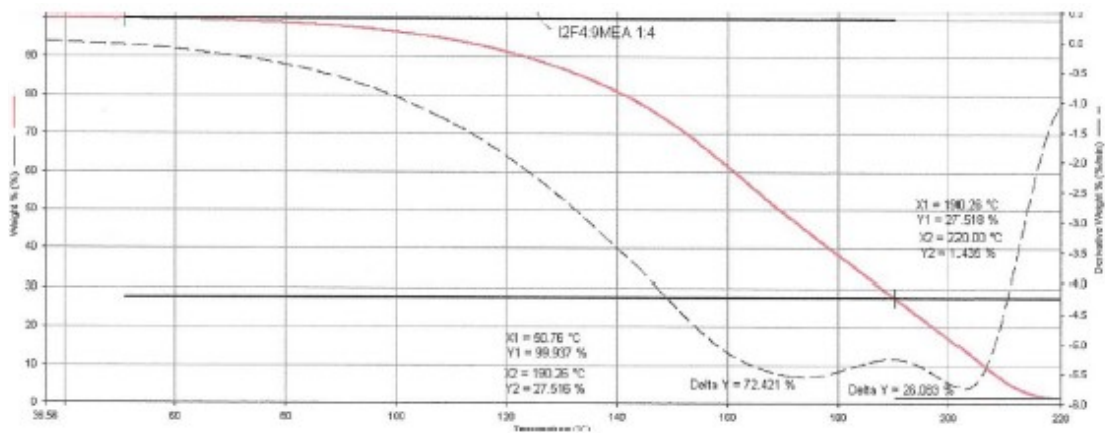

Figure ESI-6. Thermogram of (MA)4·I2F4.

### Photodimerization of crystalline MA

100 mg of pure methylantracene (MA), previously recrystallized from ethanol, was irradiated under a 365 nm LED for ca 5 h. The so-obtained solid was subjected to powder XRD analysis and further identified as the head-to-tail 9-methylantracene photodimer<sup>1</sup> (see Figure ESI-8).

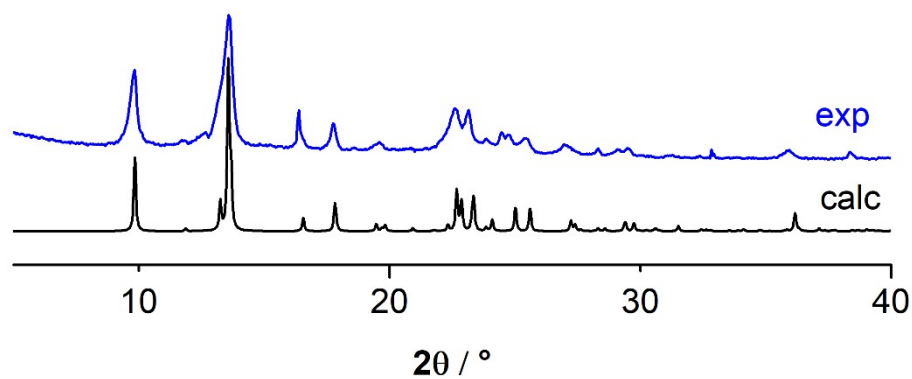

**Figure ESI-7.** Powder XRD pattern comparison between experimental (blue line) obtained after irradiation and calculated one based on the crystal structure retrieved from the CSD (black line) and corresponding to the photodimer (refcode QQQFES04).

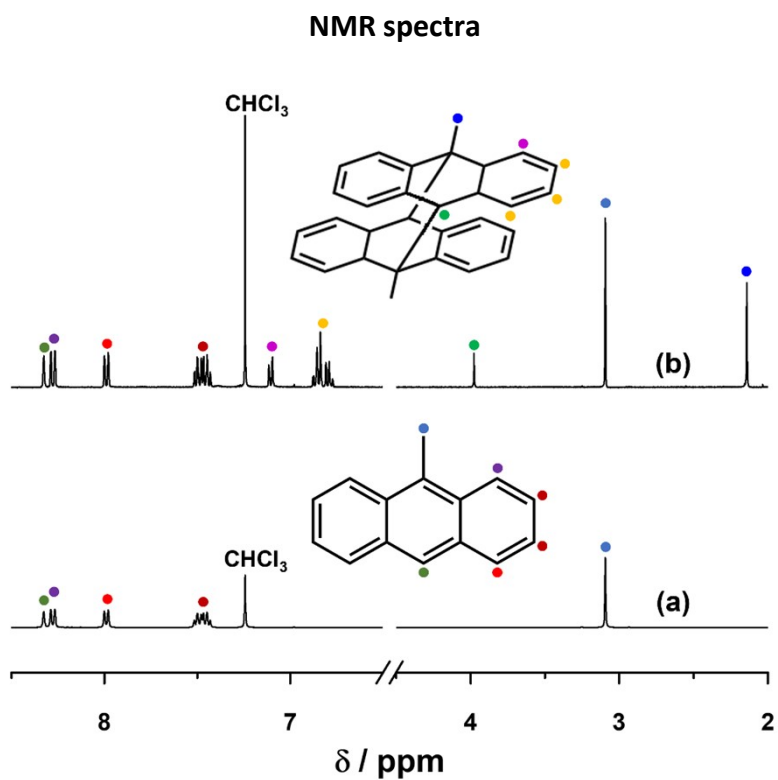

**Figure ESI-8.**  $^1\text{H}$ -NMR spectra in  $\text{CDCl}_3$  of the co-crystal  $(\text{MA})_4 \cdot \text{I}_2\text{F}_4$  before (a) and after irradiation (b).

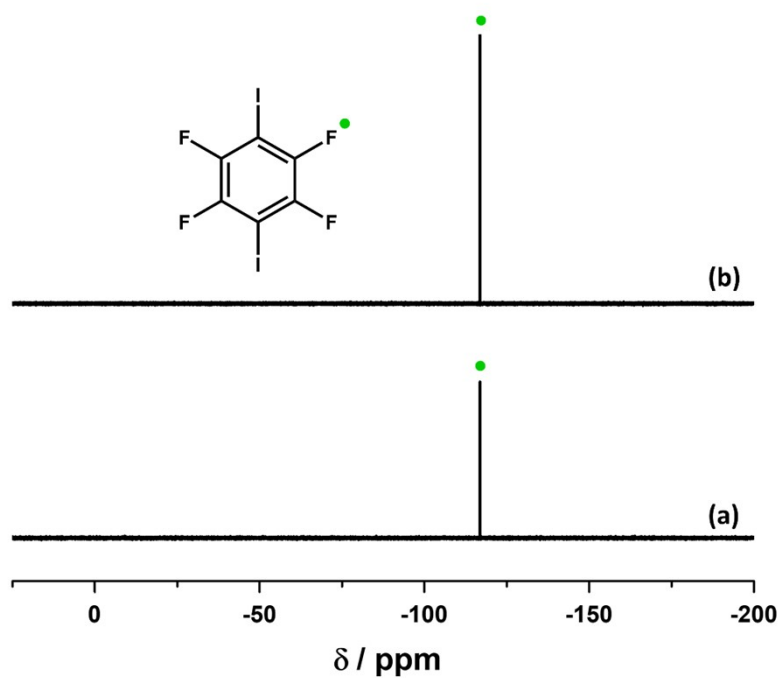

**Figure ESI-9.**  $^{19}\text{F}$ -NMR spectra in  $\text{CDCl}_3$  of the co-crystal  $(\text{MA})_4 \cdot \text{I}_2\text{F}_4$  before (a) and after irradiation (b).

## Absorption, emission and excitation spectra of A, A·(I2F4)<sub>2</sub>, MA, MA·I2F4, and (MA)<sub>4</sub>·I2F4

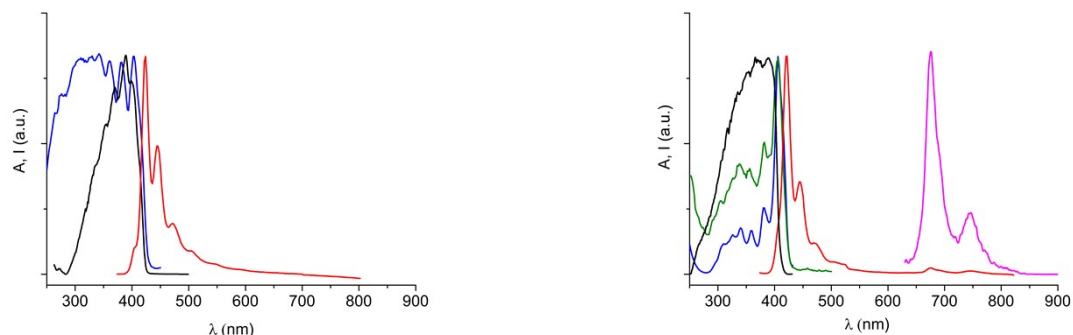

**Figure ESI-10:** Normalized absorption (black), emission (red,  $\lambda_{\text{exc}}=360$  nm) and excitation (blue,  $\lambda_{\text{em}}=472$  nm) spectra of A (left) and absorption (black), fluorescence (red,  $\lambda_{\text{exc}}=360$  nm), phosphorescence (pink,  $\lambda_{\text{exc}}=380$  nm) and excitation (blue,  $\lambda_{\text{em}}=472$  nm, fluorescence mode; green,  $\lambda_{\text{em}}=700$  nm, phosphorescence mode) spectra of A·(I2F4)<sub>2</sub> (right).

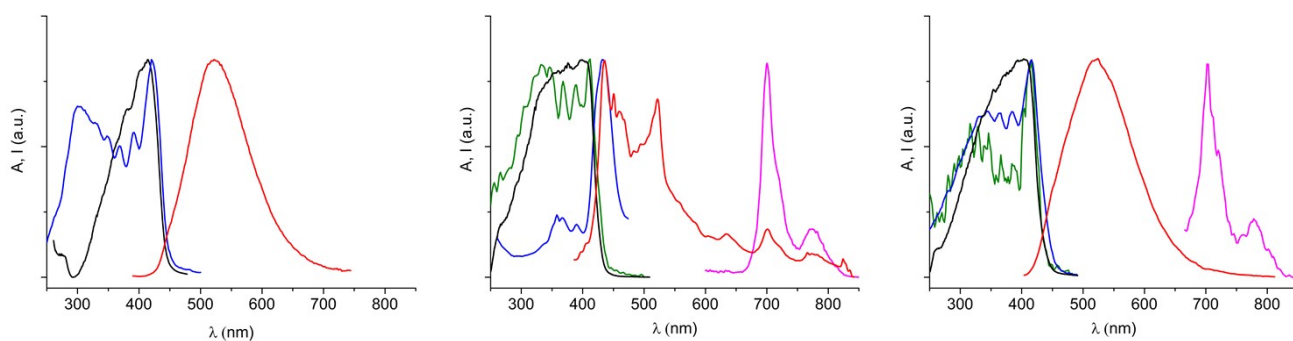

**Figure ESI-11:** Normalized absorption (black), emission (red,  $\lambda_{\text{exc}}=380$  nm) and excitation (blue,  $\lambda_{\text{em}}=520$  nm) spectra of MA (left); absorption (black), fluorescence (red,  $\lambda_{\text{exc}}=360$  nm), phosphorescence (pink,  $\lambda_{\text{exc}}=380$  nm) and excitation (blue,  $\lambda_{\text{em}}=520$  nm, fluorescence mode; green,  $\lambda_{\text{em}}=700$  nm, phosphorescence mode) spectra of MA·I2F4 (middle) and absorption (black), fluorescence (red,  $\lambda_{\text{exc}}=360$  nm), phosphorescence (pink,  $\lambda_{\text{exc}}=380$  nm) and excitation (blue,  $\lambda_{\text{em}}=520$  nm, fluorescence mode; green,  $\lambda_{\text{em}}=700$  nm, phosphorescence mode) spectra of (MA)<sub>4</sub>·I2F4 (right).

## Excited state lifetimes

Fluorescence lifetimes, detected by means of a single-photon counting apparatus, are reported in Table ESI-2 for MA, MA·I2F4 and (MA)<sub>4</sub>·I2F4. In case of A and A·(I2F4)<sub>2</sub>, measured fluorescence lifetimes were in the order of few nanoseconds, but the detection of longer lifetimes in the low energy region of the spectrum prompted us to perform a time-resolved luminescence analysis. Two components of the order of 1 ns and 6 ns characterize the fluorescence spectrum of A in the 400-470 nm region, while a third minor component with a longer lifetime of 109 ns is observable in the region 470-560 nm (Figure ESI-12). In the emission of A·(I2F4)<sub>2</sub> two main components of the order of 0.2 ns and 3 ns are accompanied by a small fraction of a longer component (550 ns) in the low energy region. Fluorescence decays at selected wavelengths in the two regions (420 nm and 470 nm) are reported in Figure ESI-13 for a visual comparison. The presence of two main components in both materials can be due to different environments experienced by the units in the crystals, both fluorescence lifetimes are indeed reduced in the co-crystal due to the increased intersystem crossing rate. The longer-lived emission can be tentatively ascribed to the presence of ground-state interactions between the PAHs units in the crystals.<sup>2,3</sup>

**Table ESI-2:** Fluorescence lifetimes of MA, MA·I2F4 and (MA)<sub>4</sub>·I2F4 at room temperature in the solid-state (in brackets: fractional intensities); excitation at 370 nm.

|                              | $\tau$ (ns)            |
|------------------------------|------------------------|
| <b>MA</b>                    | 27.3 (30%), 61.5 (70%) |
| <b>MA·I2F4</b>               | 5.6                    |
| <b>(MA)<sub>4</sub>·I2F4</b> | 6.3 (60%), 35.7 (40%)  |

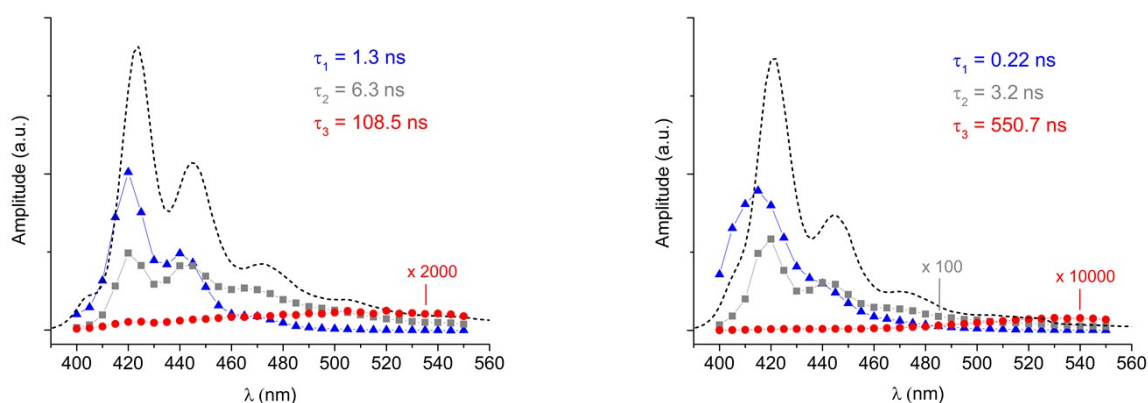

**Figure ESI-12.** DAS from time-resolved luminescence of A (left) and A·(I2F4)<sub>2</sub> (right) in the solid-state. The arbitrarily scaled steady-state emission spectrum (dashed black line) is reported for comparison purposes; the relevant lifetime components are indicated in the legend. In the graphs are shown the multiplication factors employed for some amplitudes.



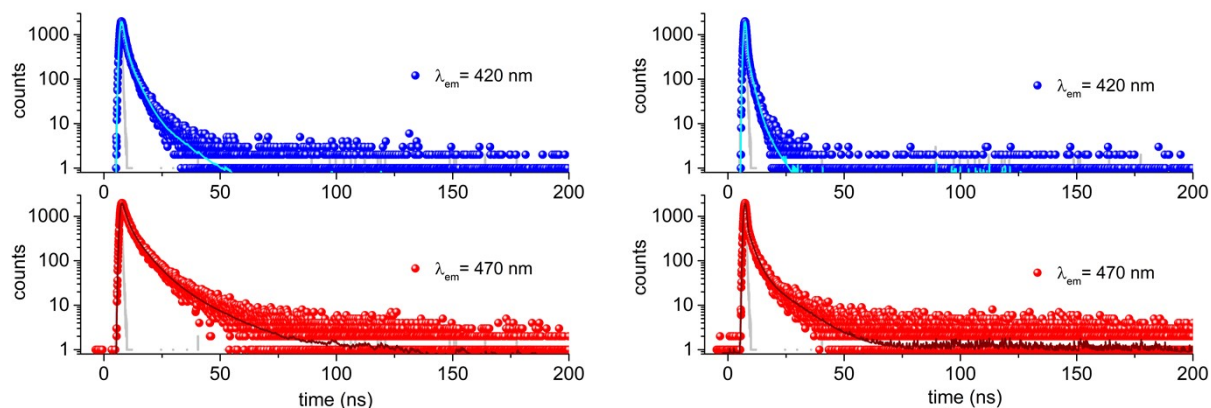

**Figure ESI-13.** Fluorescence decays, in logarithmic scale, of A (left) and A·(I2F4)<sub>2</sub> (right) in the solid state, collected at the indicated wavelengths. The excitation profiles are shown in light grey ( $\lambda_{\text{exc}} = 368$  nm). The fittings are reported as lines.

Phosphorescence lifetimes, collected by means of a single-photon counting apparatus are reported in Table ESI-3.

**Table ESI-3:** Phosphorescence lifetimes of A·(I2F4)<sub>2</sub>, MA·I2F4 and (MA)<sub>4</sub>·I2F4 at room temperature in the solid-state (in brackets: fractional intensities); excitation at 370 nm.

|                              | $\tau$ ( $\mu\text{s}$ ) |
|------------------------------|--------------------------|
| <b>A·(I2F4)<sub>2</sub></b>  | 35.0 (15%), 280.6 (85%)  |
| <b>MA·I2F4</b>               | 33.6 (20%); 200.7 (80%)  |
| <b>(MA)<sub>4</sub>·I2F4</b> | 88.2 (25%); 322.2 (75%)  |

## Intermolecular Interaction Energies

Interaction energies, resulting from the sum of electrostatic, polarization, dispersion and repulsion contributions, were evaluated with the help of the program CrystalExplorer (see references in the main text). Values for the three structures described in the paper are reported in the tables below.

Total interaction energies between pairs of molecules are indicated by the same colour in the table and in the corresponding figure (dashed lines).

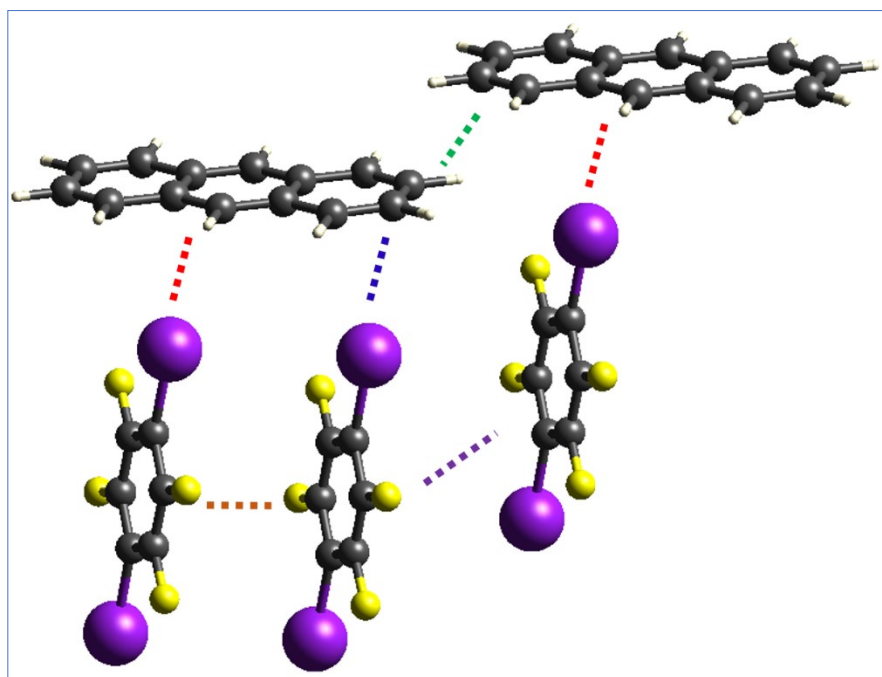

**Figure ESI-14.** Pairs of molecules contributing most to the total interaction energy in crystalline  $A \cdot (I_2F_4)_2$ .

**Table ESI-4.** Electrostatic, polarization, dispersion, repulsion terms and total interaction energy within the pairs of molecules shown in Figure ESI-14. Evaluated with the Crystal Explorer Package and using the CE-HF/3-21G ( $k_{ele} = 1.019$ ;  $k_{pol} = 0.651$ ;  $k_{disp} = 0.901$ ;  $k_{rep} = 0.811$ ) as energy model and basis set.<sup>4-6</sup>

| Interaction | $E_{ELECTROSTATIC}$ | $E_{POLARIZATION}$ | $E_{DISPERSION}$ | $E_{REPUSLION}$ | $E_{TOTAL}$ |
|-------------|---------------------|--------------------|------------------|-----------------|-------------|
|             | -8.9                | -2.0               | -20.5            | 12.5            | -18.8       |
|             | -12.5               | -2.4               | -20.5            | 22.2            | -14.8       |
|             | -4.8                | -0.8               | -11.9            | 6.4             | -10.9       |
|             | -3.3                | -1.0               | -39.7            | 18.8            | -24.6       |
|             | -5.6                | -0.6               | -30.3            | 17.0            | -19.7       |

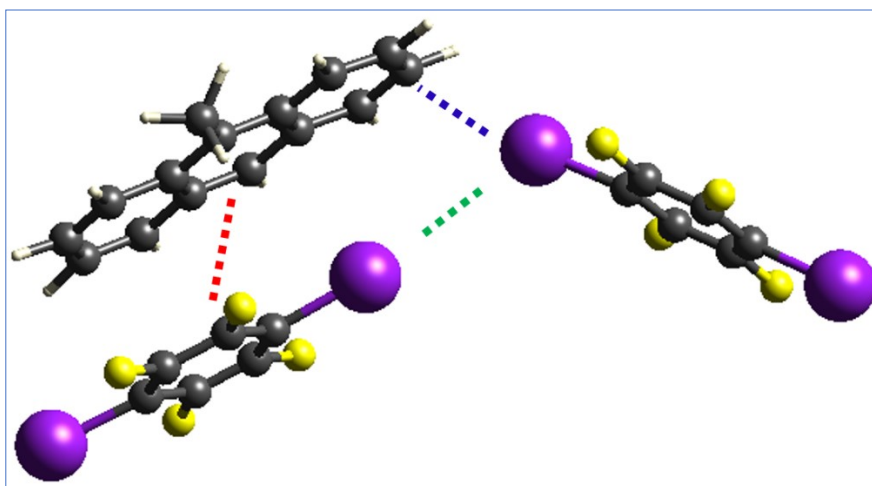

**Figure ESI-15.** Pairs of molecules contributing most to the total interaction energy in crystalline MA·I2F4.

**Table ESI-5** Electrostatic, polarization, dispersion, repulsion terms and total interaction energy within the pairs of molecules shown in Figure ESI-15. Evaluated with the Crystal Explorer Package and using the CE-HF/3-21G ( $k_{\text{ele}} = 1.019$ ;  $k_{\text{pol}} = 0.651$ ;  $k_{\text{disp}} = 0.901$ ;  $k_{\text{rep}} = 0.811$ ) as energy model and basis set.<sup>4-6</sup>

|        | Interaction | $E_{\text{ELECTROSTATIC}}$ | $E_{\text{POLARIZATION}}$ | $E_{\text{DISPERSION}}$ | $E_{\text{REPULSION}}$ | $E_{\text{TOTAL}}$ |
|--------|-------------|----------------------------|---------------------------|-------------------------|------------------------|--------------------|
| Pair 1 |             | -15.4                      | -3.4                      | -56.6                   | 32.4                   | -42.6              |
|        |             | -6.4                       | -1.3                      | -11.7                   | 9.1                    | -10.6              |
|        |             | -1.9                       | -0.4                      | -7.1                    | 5.7                    | -4.0               |
| Pair 2 |             | -17.7                      | -3.7                      | -58.7                   | 34.4                   | -45.4              |
|        |             | -5.4                       | -1.1                      | -10.7                   | 6.4                    | -10.7              |
|        |             | -2.2                       | -0.4                      | -7.4                    | 6.8                    | -3.7               |

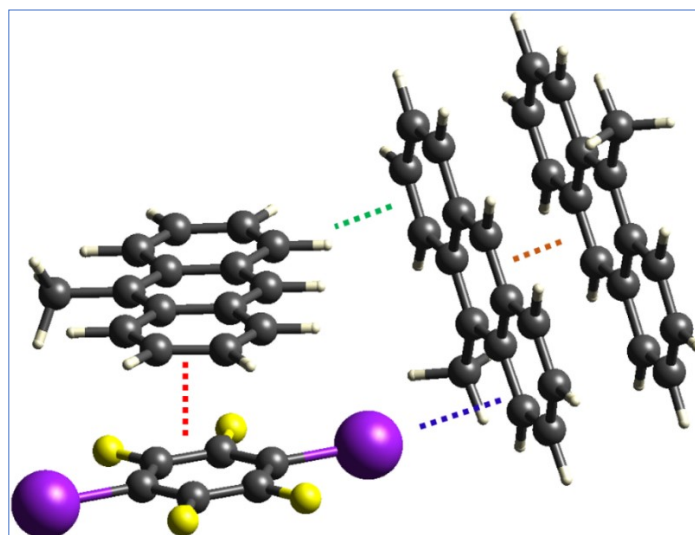

**Figure ESI-16.** Pairs of molecules contributing most to the total interaction energy in crystalline  $(MA)_4I_2F_4$

**Table ESI-6.** Electrostatic, polarization, dispersion, repulsion terms and total interaction energy within the pairs of molecules shown in Figure ESI-16. Evaluated with the Crystal Explorer Package and using the CE-HF/3-21G ( $k_{ele} = 1.019$ ;  $k_{pol} = 0.651$ ;  $k_{disp} = 0.901$ ;  $k_{rep} = 0.811$ ) as energy model and basis set.<sup>4-6</sup>

| Interaction | $E_{ELECTROSTATIC}$ | $E_{POLARIZATION}$ | $E_{DISPERSION}$ | $E_{REPULSION}$ | $E_{TOTAL}$ |
|-------------|---------------------|--------------------|------------------|-----------------|-------------|
|             | -13.1               | -3.6               | -59.0            | 26.5            | -47.4       |
|             | -12.1               | -2.5               | -21.6            | 19.5            | -17.6       |
|             | -5.9                | -1.7               | -20.4            | 9.4             | -17.9       |
|             | 3.5                 | -7.7               | -73.5            | 36.0            | -38.5       |

## References

- 1 A. F. Mabied, M. Müller, R. E. Dinnebier, S. Nozawa, M. Hoshino, A. Tomita, T. Sato and S. Adachi, *Acta Crystallogr. B.*, 2012, **68**, 424–430.
- 2 J. Dey and I. M. Warner, *J. Phys. Chem. A*, 1997, **101**, 4872–4878.
- 3 T. Hinoue, Y. Shigenoi, M. Sugino, Y. Mizobe, I. Hisaki, M. Miyata and N. Tohnai, *Chem. – A Eur. J.*, 2012, **18**, 4634–4643.
- 4 P. R. Spackman, M. J. Turner, J. J. McKinnon, S. K. Wolff, D. J. Grimwood, D. Jayatilaka and M. A. Spackman, *J. Appl. Crystallogr.*, 2021, **54**, 1006–1011.
- 5 C. F. Mackenzie, P. R. Spackman, D. Jayatilaka and M. A. Spackman, *IUCrJ*, 2017, **4**, 575–587.
- 6 S. P. Thomas, P. R. Spackman, D. Jayatilaka and M. A. Spackman, *J. Chem. Theory Comput.*, 2018, **14**, 1614–1623.
